# Supplementary material for: Facile synthesis of SnO2@carbon nanocomposites for lithium-ion batteries
Source: Royal Society of Chemistry journal article supplement (doi:10.1039/c9nj06110j), 2020-01-01
Supplement: c9nj06110j1.pdf [file c9nj06110j1.pdf]

## Electronic Supplementary information

### Facile synthesis of SnO<sub>2</sub>@carbon nanocomposite for lithium ion battery

Anuradha A Ambalkar,<sup>a</sup>Rajendra P Panmand,<sup>b</sup> Ujjwala V Kawade,<sup>a</sup>Yogesh Sethi,<sup>a</sup>Sonali D Naik,<sup>a</sup>Milind V Kulkarni,<sup>a</sup>Parag V Adhyapak,<sup>a\*</sup> Bharat B Kale<sup>a\*</sup>

#### S1: The rate performance at different current densities and Cycling performances

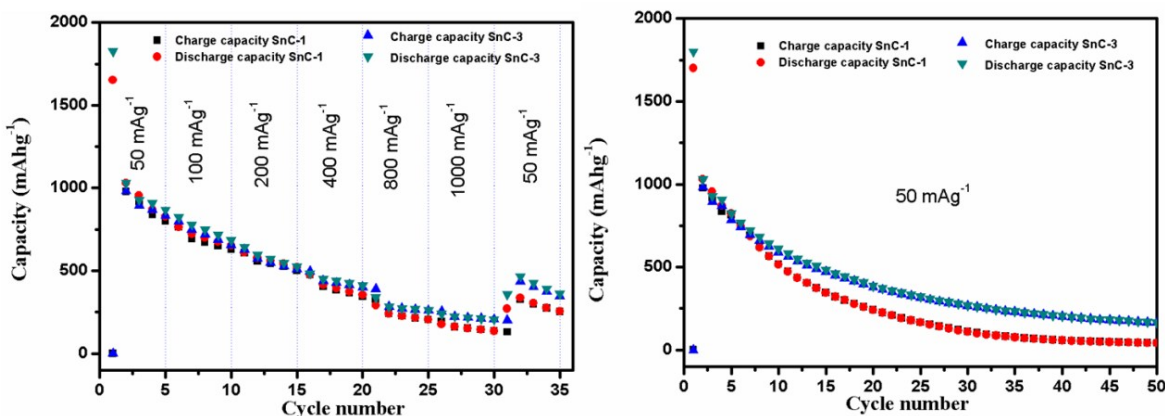

Figure. S1 The rate performance, at different current densities and Cycling performances of SnC-1, and SnC-3 between 0.01 and 3V for lithium ion batteries for 50 cycles.

The 50th discharge capacities of pristine SnC-0, SnC-1, SnC-2 and SnC-3 were 41, 135, 808 and 164 mAhg<sup>-1</sup>. This study, demonstrates SnC-2 shows better stability compared to other samples. Therefore further rate performance and cyclability study (200 cycles) carried out for pristine and SnC-2 sample.

#### S2: Columbic efficiency of SnC-0 and SnC-2 sample

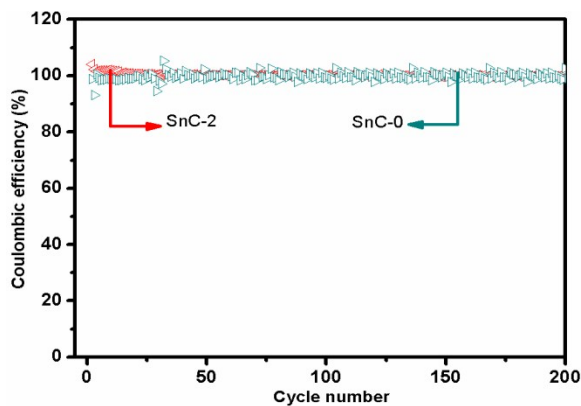

Figure. S2 The columbic efficiency of the SnO<sub>2</sub> and SnO<sub>2</sub>@C nanocomposites (SnC-2) electrodes for lithium ion batteries.

#### S3: Tap density of nanocomposites powder

As procedure given in report tapped density of a powder is the ratio of the mass of the powder to the volume occupied by the powder after it has been tapped for a defined period of time. <sup>1, 2, 3</sup>The tapped density of a powder represents its random dense packing. It is measured using eq.

$$\text{Tapped Density (g/mL)} = M \cdot V_f$$

Where, M = mass in grams, Vf = tapped volume in milliliters.<sup>4</sup> The tap density of SnC-0, SnC-1, SnC-2 and SnC-3 are 1.225, 0.981, 0.668, and 0.386 g/mL.

#### S4: Press density of Anode

Press density of the electrode film is also measured via gravimetric method using following eq.

$$d = m / (A \cdot \rho)$$

Where, d = film thickness, m = mass,  $\rho$  = density, and A = area covered. The density of SnC-0 SnC-1, SnC-2 and SnC-3 electrodes before roll press are 0.724, 0.25, 0.692 and 0.3944 g/cc which is increased 0.94, 0.36, 1.2454 and 0.743 g/cc after roll press respectively. Density of the electrode increases with the concentration of the citric acid.<sup>5,6,7</sup>

**Table S1. Comparison of the SnO<sub>2</sub>/C composites for their electrochemical performance**

| No        | Current density                       | Capacity mAhg <sup>-1</sup> (at initial Cycle) | Rate performance capacity (mAhg <sup>-1</sup> ) @ current density (cycle) | Reference                                                                 |
|-----------|---------------------------------------|------------------------------------------------|---------------------------------------------------------------------------|---------------------------------------------------------------------------|
| 1.        | 250mA <sub>g</sub> <sup>-1</sup>      | 1946                                           | 1050@250 mA <sub>g</sub> <sup>-1</sup> (130)                              | Co <sub>3</sub> Sn <sub>2</sub> /SnO <sub>2</sub> on Cu foam <sup>8</sup> |
| 2.        | 100mA <sub>g</sub> <sup>-1</sup>      | 1020                                           | 474@1000mA <sub>g</sub> <sup>-1</sup> (50)                                | CuxO/SnO <sub>2</sub> /ZnSnO <sub>3</sub> <sup>9</sup>                    |
| 3.        | 100mA <sub>g</sub> <sup>-1</sup>      | 684                                            | 494@100mA <sub>g</sub> <sup>-1</sup> (200)                                | SnO <sub>2</sub> @carbon for Na ion battery <sup>10</sup>                 |
| 4.        | 0.1A/g                                | 2010                                           | 500@0.1 A <sub>g</sub> <sup>-1</sup> (40)                                 | SnO <sub>2</sub> nanotube <sup>11</sup>                                   |
| 5.        | 0.2C                                  | 1267                                           | 674@0.2C (35)                                                             | Ni-doped SnO <sub>2</sub> <sup>12</sup>                                   |
| 6.        | 50mA <sub>g</sub> <sup>-1</sup>       | 2805                                           | 537@50mA <sub>g</sub> <sup>-1</sup> (50)                                  | graphene-TiO <sub>2</sub> -SnO <sub>2</sub> <sup>13</sup>                 |
| 7.        | 0.1C                                  | 1580                                           | 404@0.1C(50)                                                              | TiN surface modified SnO <sub>2</sub> <sup>14</sup>                       |
| 8.        | 500mA <sub>g</sub> <sup>-1</sup>      | 1700                                           | 500@500 mA <sub>g</sub> <sup>-1</sup> (20)                                | Carbon-Coated SnO <sub>2</sub> <sup>15</sup>                              |
| 9.        | 100mA <sub>g</sub> <sup>-1</sup>      | 964                                            | 420@100 mA <sub>g</sub> <sup>-1</sup> (100)                               | SnO <sub>2</sub> @carbon composite nanofibers <sup>16</sup>               |
| 10.       | C/20                                  | 460                                            | 500@1C(20)                                                                | SnO <sub>2</sub> / Mesoporous Carbon <sup>17</sup>                        |
| <b>8.</b> | <b>50 mA<sub>g</sub><sup>-1</sup></b> | <b>1850</b>                                    | <b>119@50 mA<sub>g</sub><sup>-1</sup> (200)</b>                           | <b>Present work (SnO<sub>2</sub>)</b>                                     |
| <b>9.</b> | <b>50 mA<sub>g</sub><sup>-1</sup></b> | <b>2581</b>                                    | <b>725@50 mA<sub>g</sub><sup>-1</sup> (200)</b>                           | <b>present work (SnO<sub>2</sub>@C)</b>                                   |

#### Notes and references

- Zhang, Y.; Wang, Z.-B.; Nie, M.; Yu, F.-D.; Yun-Fei, X.; Liu, B.-S.; Xue, Y.; Zheng, L.-L.; Wu, J., A simple method for industrialization to enhance the tap density of LiNi<sub>0.5</sub>Co<sub>0.2</sub>Mn<sub>0.3</sub>O<sub>2</sub> cathode material for high-specific volumetric energy lithium-ion batteries. *RSC Advances* **2016**, *6* (70), 65941-65949.
- Abdullah, E. C.; Geldart, D., The use of bulk density measurements as flowability indicators. *Powder Technology* **1999**, *102* (2), 151-165.
- Klavetter, K. C.; De Souza, J. P.; Heller, A.; Mullins, C. B., High tap density microparticles of selenium-doped germanium as a high efficiency, stable cycling lithium-ion battery anode material. *Journal of Materials Chemistry A* **2015**, *3* (11), 5829-5834.
- <https://www.sciencedirect.com/topics/biochemistry-genetics-and-molecular-biology/tapped-density>.
- [https://www.researchgate.net/post/What\\_is\\_the\\_importance\\_of\\_pressing\\_composite\\_anode\\_or\\_cathode\\_films](https://www.researchgate.net/post/What_is_the_importance_of_pressing_composite_anode_or_cathode_films).
- [https://www.researchgate.net/post/How\\_can\\_I\\_calculate\\_coating\\_density](https://www.researchgate.net/post/How_can_I_calculate_coating_density).
- Shim, J.; Striebel, K. A., Effect of electrode density on cycle performance and irreversible capacity loss for natural graphite anode in lithium-ion batteries. *Journal of power sources* **2003**, *119*, 934-937.

8. Zhang, D.; Bi, C.; Wu, Q.; Hou, G.; Zheng, G.; Wen, M.; Tang, Y., Co<sub>3</sub>Sn<sub>2</sub>/SnO<sub>2</sub> nanocomposite loaded on Cu foam as high-performance three-dimensional anode for lithium-ion batteries. *New Journal of Chemistry* **2019**, *43* (3), 1238-1246.
9. Zhang, M.; Ma, J.; Zhang, Y.; Lu, L.; Chai, Y.; Yuan, R.; Yang, X., Ion exchange for synthesis of porous Cu<sub>x</sub>O/SnO<sub>2</sub>/ZnSnO<sub>3</sub> microboxes as a high-performance lithium-ion battery anode. *New Journal of Chemistry* **2018**, *42* (14), 12008-12012.
10. Sridhar, V.; Park, H., Hollow SnO<sub>2</sub>@carbon core-shell spheres stabilized on reduced graphene oxide for high-performance sodium-ion batteries. *New Journal of Chemistry* **2017**, *41* (2), 442-446.
11. Um, J. H.; Yu, S.-H.; Cho, Y.-H.; Sung, Y.-E., SnO<sub>2</sub> nanotube arrays embedded in a carbon layer for high-performance lithium-ion battery applications. *New Journal of Chemistry* **2015**, *39* (4), 2541-2546.
12. Ye, X.; Zhang, W.; Liu, Q.; Wang, S.; Yang, Y.; Wei, H., One-step synthesis of Ni-doped SnO<sub>2</sub> nanospheres with enhanced lithium ion storage performance. *New Journal of Chemistry* **2015**, *39* (1), 130-135.
13. Jiang, X.; Yang, X.; Zhu, Y.; Fan, K.; Zhao, P.; Li, C., Designed synthesis of graphene-TiO<sub>2</sub>-SnO<sub>2</sub> ternary nanocomposites as lithium-ion anode materials. *New Journal of Chemistry* **2013**, *37* (11), 3671-3678.
14. Liu, M.; Li, X.; Ming, H.; Adkins, J.; Zhao, X.; Su, L.; Zhou, Q.; Zheng, J., TiN surface modified SnO<sub>2</sub> as an efficient anode material for lithium ion batteries. *New Journal of Chemistry* **2013**, *37* (7), 2096-2102.
15. Moon, T.; Kim, C.; Hwang, S.-T.; Park, B., Electrochemical properties of disordered-carbon-coated SnO<sub>2</sub> nanoparticles for Li rechargeable batteries. *Electrochemical and solid-state letters* **2006**, *9* (9), A408-A411.
16. Yang, Z.; Du, G.; Guo, Z.; Yu, X.; Chen, Z.; Zhang, P.; Chen, G.; Liu, H., Easy preparation of SnO<sub>2</sub>@carbon composite nanofibers with improved lithium ion storage properties. *Journal of materials research* **2010**, *25* (8), 1516-1524.
17. Di Lupo, F.; Gerbaldi, C.; Meligrana, G.; Bodoardo, S.; Penazzi, N., *Novel SnO<sub>2</sub>/mesoporous carbon spheres composite anode for Li-ion batteries*. 2011; Vol. 6, p 3580-3593.
